# Supplementary material for: Enrichment of nitrifying bacteria and microbial diversity analysis by high-throughput sequencing
Source: Royal Society of Chemistry journal article supplement (doi:10.1039/c6ra24213h), 2016-01-01
Supplement: c6ra24213h1.pdf [file c6ra24213h1.pdf]

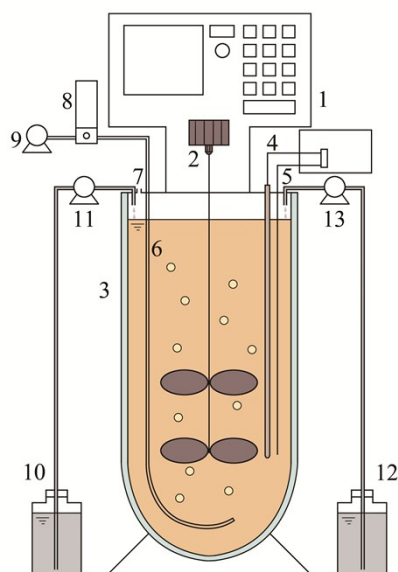

**Fig. S1** Schematic diagram of the miniature fermenter: (1) operation interface, (2) stirrer, (3) water bath, (4) pH probe, (5) temperature probe, (6) perforated tube aeration, (7) sampling port, (8) gas flowmeter, (9) air pump, (10)  $\text{Na}_2\text{CO}_3$  feed bottle, (11)  $\text{Na}_2\text{CO}_3$  feed pump, (12)  $\text{NH}_4\text{Cl}$  feed bottle, (13)  $\text{NH}_4\text{Cl}$  feed pump.

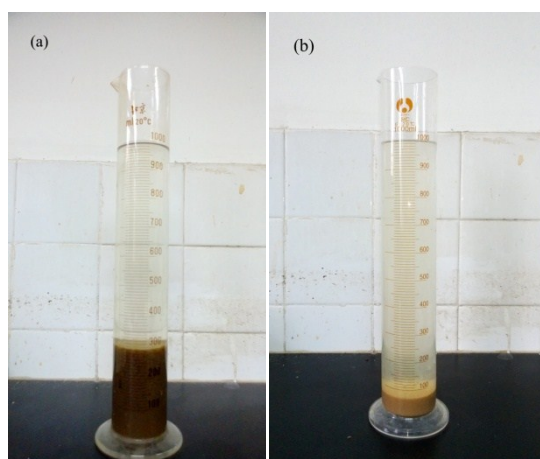

**Fig. S2** The sludge properties during the period of the enrichment of nitrifying bacteria community: (a) The seed sludge; (b) The nitrifying bacteria community enriched sludge.
